# Supplementary material for: Integrin-αV-mediated activation of TGF-β regulates anti-tumour CD8 T cell immunity and response to PD-1 blockade
Source: PubMed Central journal article supplement (PMC8410945; doi:10.1038/s41467-021-25322-y), 2021-09-01
Supplement: 41467_2021_25322_MOESM1_ESM.pdf [file 41467_2021_25322_MOESM1_ESM.pdf]

## Supplementary information

### **Integrin- $\alpha$ <sub>v</sub>-mediated activation of TGF- $\beta$ regulates anti-tumour CD8 T-cell immunity and response to PD-1 blockade**

Ines Malenica<sup>1</sup>, Julien Adam<sup>1†</sup>, Stéphanie Corgnac<sup>1†</sup>, Laura Mezquita<sup>2‡</sup>, Edouard Auclin<sup>3</sup>, Isabelle Damei<sup>1</sup>, Laetitia Grynszpan<sup>1</sup>, Gwendoline Gros<sup>1</sup>, Vincent de Montpréville<sup>1,4</sup>, David Planchard<sup>2</sup>, Nathalie Theret<sup>5</sup>, Benjamin Besse<sup>2</sup> and Fathia Mami-Chouaib<sup>1\*</sup>

<sup>1</sup> INSERM UMR 1186, Integrative Tumour Immunology and Immunotherapy, Gustave Roussy, Fac. de Médecine - Univ. Paris-Sud, Université Paris-Saclay, 94805, Villejuif, France

<sup>2</sup> Department of Cancer Medicine, Gustave Roussy Cancer Campus, Institut d'Oncologie Thoracique, Gustave Roussy, Université Paris-Saclay, Villejuif

<sup>3</sup> Medical and Thoracic Oncology Department, Hôpital Européen Georges Pompidou, AP-HP, Paris, France

<sup>4</sup> Hôpital Marie-Lannelongue, Service d'Anatomie Pathologique, 92350, Le-Plessis-Robinson, France

<sup>5</sup> Univ Rennes, Inserm, EHESP, Irset-UMR-S1085, Rennes, France

† These authors contributed equally: Julian Adam, Stéphanie Corgnac

‡ Current address, Laboratory of Translational Genomics and Targeted Therapeutics in Solid Tumours, August Pi i Sunyer Biomedical Research Institute (IDIBAPS), Barcelona, Spain; Medical Oncology Department, Hospital Clínic, Barcelona, Spain

\* **Corresponding author:** Fathia Mami-Chouaib, INSERM UMR 1186, Gustave Roussy. 39, rue Camille Desmoulins, F-94805 Villejuif. Phone: +33 1 42 11 49 65, Fax: +33 1 42 11 52 88, e-mail: fathia.mami-chouaib@gustaveroussy.fr

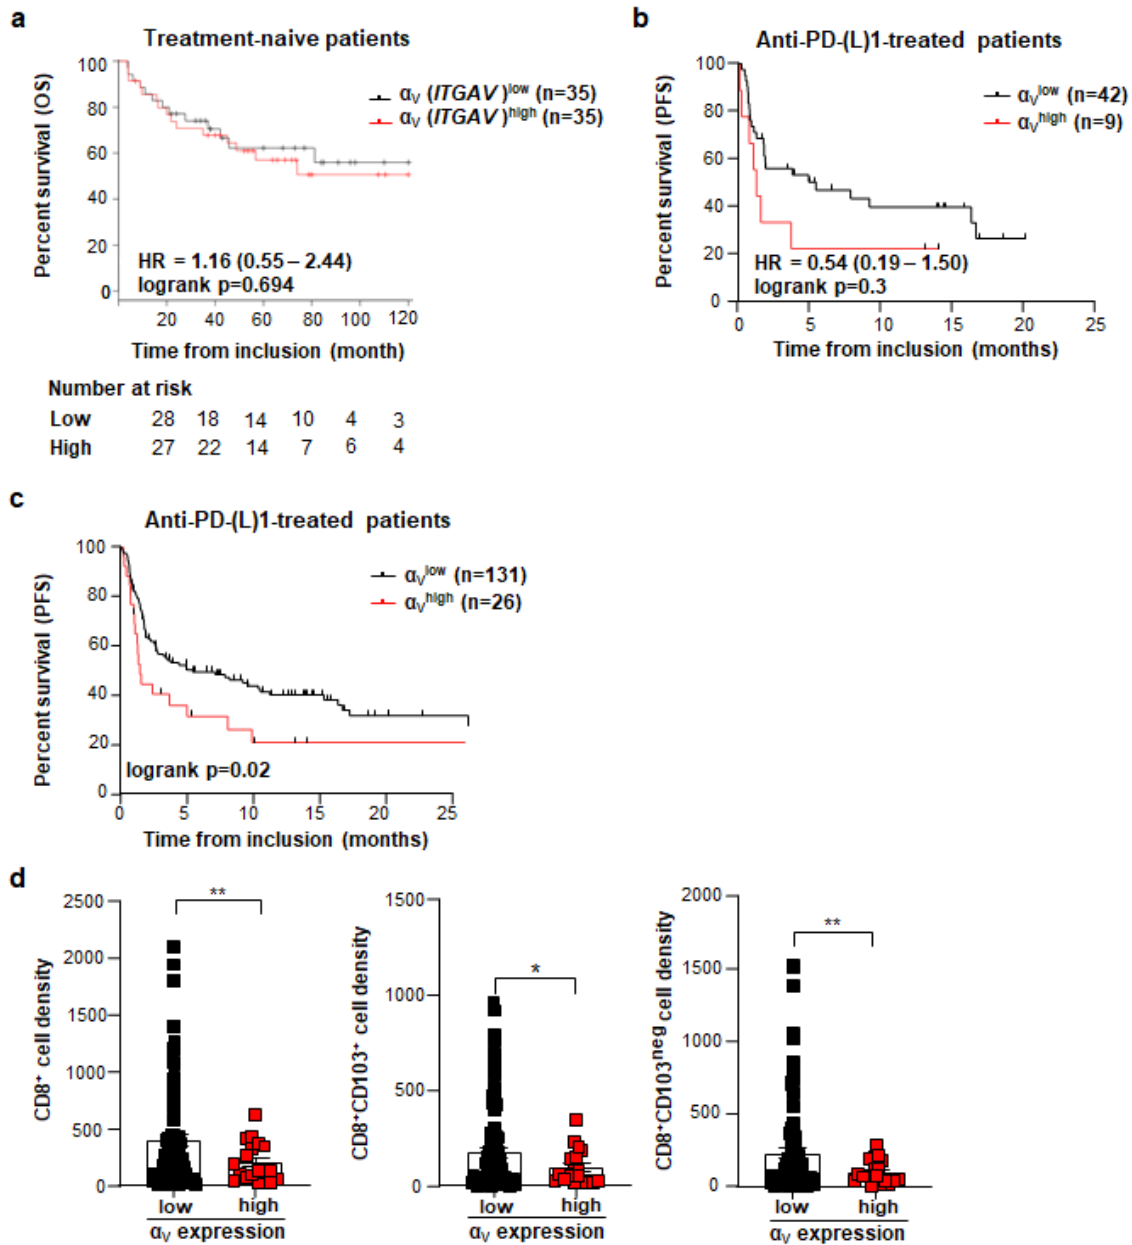

**Supplementary Figure 1.** Expression of  $\alpha_V$  integrin in NSCLC tumours and correlation with patient survival and CD8 T-cell infiltration. **a.** Kaplan-Meier curve shows overall survival (OS) of public TCGA datasets from stage I treatment-naïve lung cancer patients (n=70) according to *ITGAV* mRNA expression. Expression range of the probe 486-8990. Cut-off value=2072. Follow up threshold=120 months. Median survival  $\alpha_V^{\text{low}}$ = 27.7 months,  $\alpha_V^{\text{high}}$ = 21.7 months. **b.** Kaplan-Meier curve shows PFS of PD-(L)1 blockade-treated patients (cohort 2) with tumours harbouring low and high expression of  $\alpha_V$  integrin; p-value was determined by log-rank test. **c.** Kaplan-Meier curve shows PFS of PD-(L)1 blockade-treated patients (combined cohorts 1 and 2) with tumours harbouring low and high expression for  $\alpha_V$  integrin; p-value was determined by log-rank test. **d.** Density of CD8<sup>+</sup> (\*\*p=0.004), CD8<sup>+</sup>CD103<sup>+</sup> (\*p=0.024) and CD8<sup>+</sup>CD103<sup>neg</sup> (\*\*p=0.002) cells in  $\alpha_V^{\text{low}}$  (n=90) and  $\alpha_V^{\text{high}}$  (n=18) tumours (combined cohorts 1 and 2). Each symbol represents an individual cell type from tumour samples; horizontal lines correspond to mean  $\pm$  standard error of the mean (SEM) (d.). Data were calculated with log-rank test (a., b. and c.) and Welch's two-sided t test (d.). Footnote, density of CD8<sup>+</sup> (p=0.266), CD8<sup>+</sup>CD103<sup>+</sup> (p=0.542) and CD8<sup>+</sup>CD103<sup>neg</sup> (p=0.352) in  $\alpha_V^{\text{low}}$  and  $\alpha_V^{\text{high}}$  tumours from pooled cohorts 1 and 2 using Mann-Whitney t-test. Source data are provided as a Source Data file.

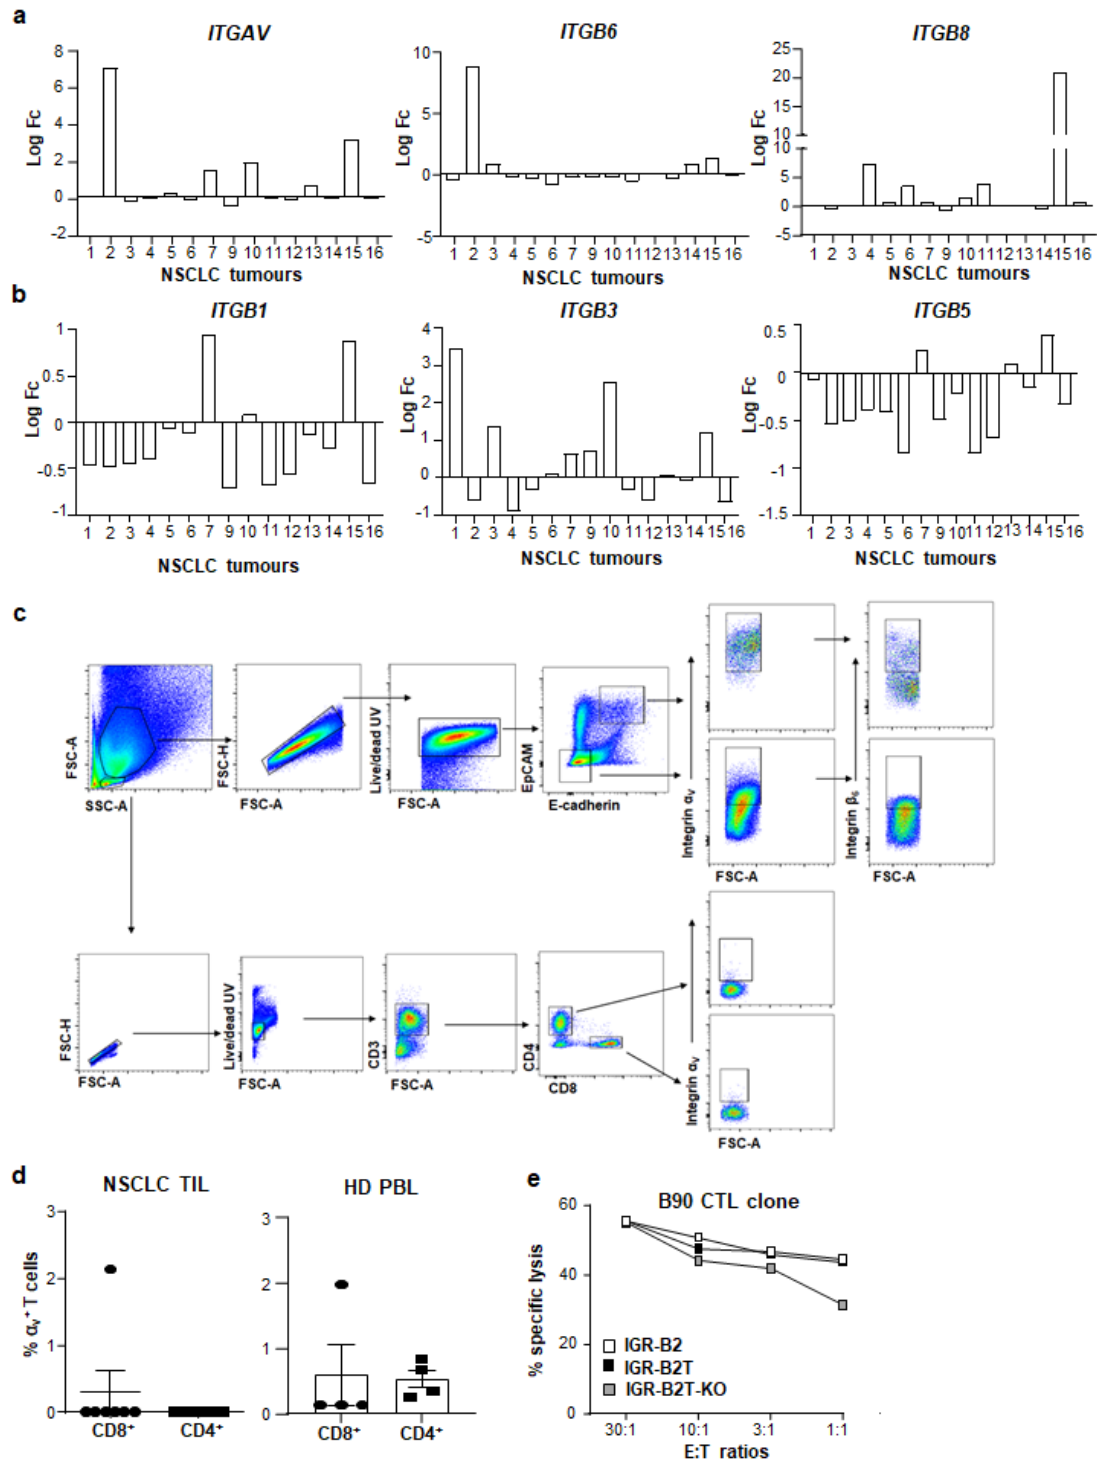

**Supplementary Figure 2.** Expression of integrin subunits in NSCLC tumours and T cells, and susceptibility of  $\alpha_v$ -KO tumour cells to autologous CTL. **a.** Expression of *ITGAV*, *ITGB6* and *ITGB8* transcripts in fresh NSCLC tumours (n=15). **b.** Expression of *ITGB1*, *ITGB3*, *ITGB5* transcripts in human lung tumours. Results were presented on a log scale as a reduction or an increase in gene expression in tumour samples as compared to autologous healthy lung tissues. **c.** Upper panel, gating strategies to determine the percentage of  $\alpha_v^+$  and  $\alpha_v\beta_6^+$  cells in EpCAM<sup>+</sup>E-cadherin<sup>+</sup> tumour cells and EpCAM<sup>neg</sup>E-cadherin<sup>neg</sup> non-epithelial cells from freshly resected human NSCLC tumours (used in Fig. 1a and 1b). Lower panel, gating strategies to determine the percentage of  $\alpha_v^+$  cells among CD4<sup>+</sup> and CD8<sup>+</sup> TIL isolated from fresh NSCLC tumours and human healthy donor (HD) peripheral blood mononuclear cells (PBMC), used in Supplementary Fig. 2d. **d.** Percentages of integrin  $\alpha_v^+$  lymphocytes among CD8<sup>+</sup> and CD4<sup>+</sup> TIL from human NSCLC (n=7, p=0.377) and HD CD8<sup>+</sup> and CD4<sup>+</sup> T cells (n=4, p>0.999) isolated from PBMC. Each symbol represents an individual cell type; horizontal line corresponds to mean  $\pm$  SEM. Data were calculated with unpaired Student t-test. **e.** Cytotoxic activity of the B90 CTL clone toward autologous tumour cells. Cytotoxicity toward IGR-B2, IGR-B2T and IGR-B2T-KO tumour cells was determined by a conventional 4-h <sup>51</sup>Cr release assay at indicated E:T ratios. Data shown correspond to one experiment out of two. Source data are provided as a Source Data file.

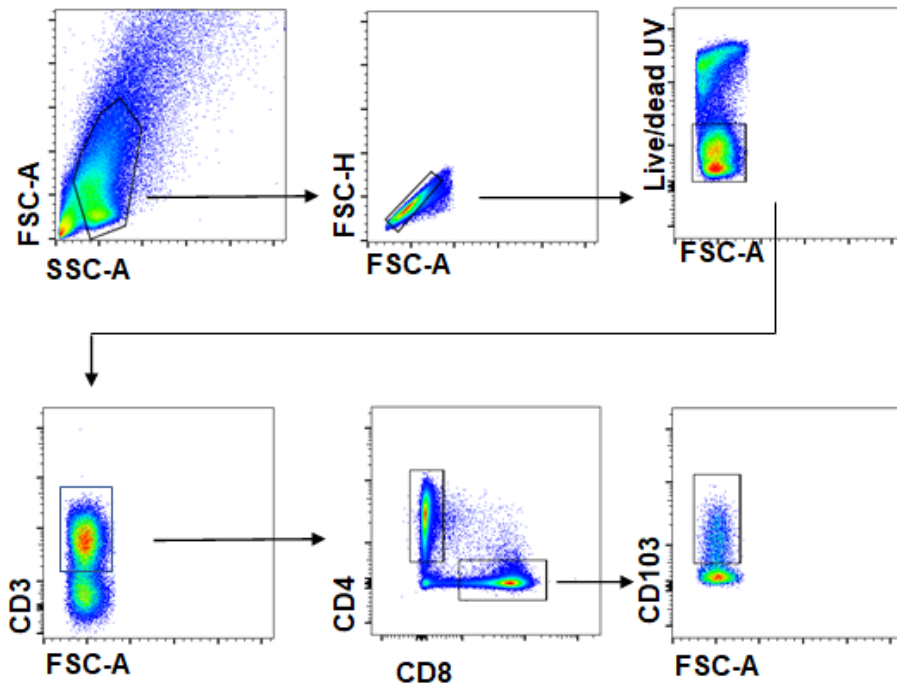

**Supplementary Figure 3.** Gating strategies for human peripheral blood T cells. Gating strategies to determine the percentage of CD103<sup>+</sup> cells among CD8<sup>+</sup> cells from anti-CD3-stimulated healthy donor PBMC. Cells were cultured in the presence of conditioned medium (CM) from IGR-B2T or IGR-B2T-KO cells (used in Fig. 3a-c).

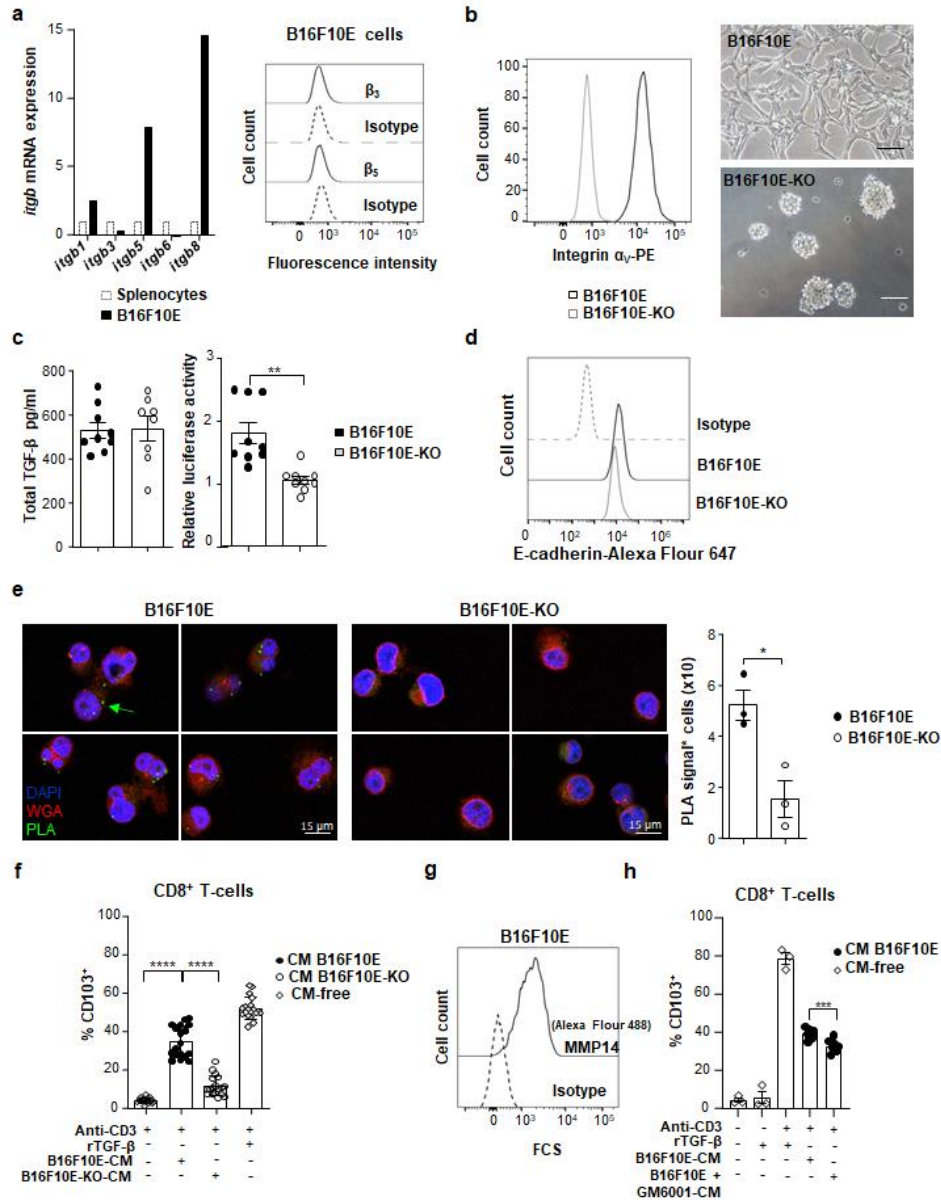

**Supplementary Figure 4.** Characterisation of murine B16F10E cells and induction of CD103 on CD8<sup>+</sup> T cells.

**a.** Expression of *itgb1*, *itgb3*, *itgb5*, *itgb6*, and *itgb8* transcripts in B16F10E determined by qRT-PCR and normalized to *I8S* expression. Control: splenocytes. Right, expression of β<sub>3</sub> and β<sub>5</sub> proteins in B16F10E. **b.** Surface expression of α<sub>V</sub> integrin in B16F10E and B16F10E-KO cells. Right, the morphology of B16F10E and B16F10E-KO cells observed by phase-contrast light microscope. Objective: 20x. Scale bar 1 cm. Representative photos are from one experiment out of five. **c.** Concentration of total TGF-β in CM from B16F10E and B16F10E-KO (n=9), measured by ELISA, p=0.917. Right, relative luciferase activity in Mu.1LV reporter cells treated with CM from B16F10E and B16F10E-KO cells (n=9), \*\*p=0.005. Data are normalized to luciferase activity in non-treated cells. Results are represented as mean ± SEM of 9 independent experiments. **d.** Surface expression of E-cadherin on B16F10E and B16F10E-KO (one experiment out of four). **e.** Representative images by confocal microscope of B16F10E and B16F10E-KO. Magnification: 20x. Right, ratio of PLA signal per number of B16F10E and B16F10E-KO cells. Results are means ± SEM of green dots/cell counted in 500-600 cells from 3 independent experiments, \*p=0.016. **f.** Percentages of CD103<sup>+</sup> cells among CD8<sup>+</sup> T lymphocytes from PBMC isolated from human HD and stimulated with plastic-coated anti-CD3 mAb alone or in combination with CM from B16F10E or B16F10E-KO (n=18). Positive control: a combination of anti-CD3 plus rTGF-β. Results are represented as mean ± SEM of 18 independent experiments, \*\*\*\*p<0.0001. **g.** Expression of MMP14 on B16F10E cell surface (one experiment out of three). **h.** Percentages of CD103<sup>+</sup> cells in CD8<sup>+</sup> T lymphocytes from HD PBMC (n=8) stimulated with anti-CD3 in combination with CM from B16F10E untreated or treated with the MMP14 inhibitor GM6001, \*\*\*p=0.0004. Controls: anti-CD3, rTGF-β and a combination of reagents (n=3). Results are represented as mean ± SEM of 3 independent experiments. Data were calculated with unpaired Student t-test (c., e. and h.) and one-way ANOVA with Tukey's correction (f.). Gating strategy for f. and h. is presented in Supplementary Fig. 3a. Source data are provided as a Source Data file.

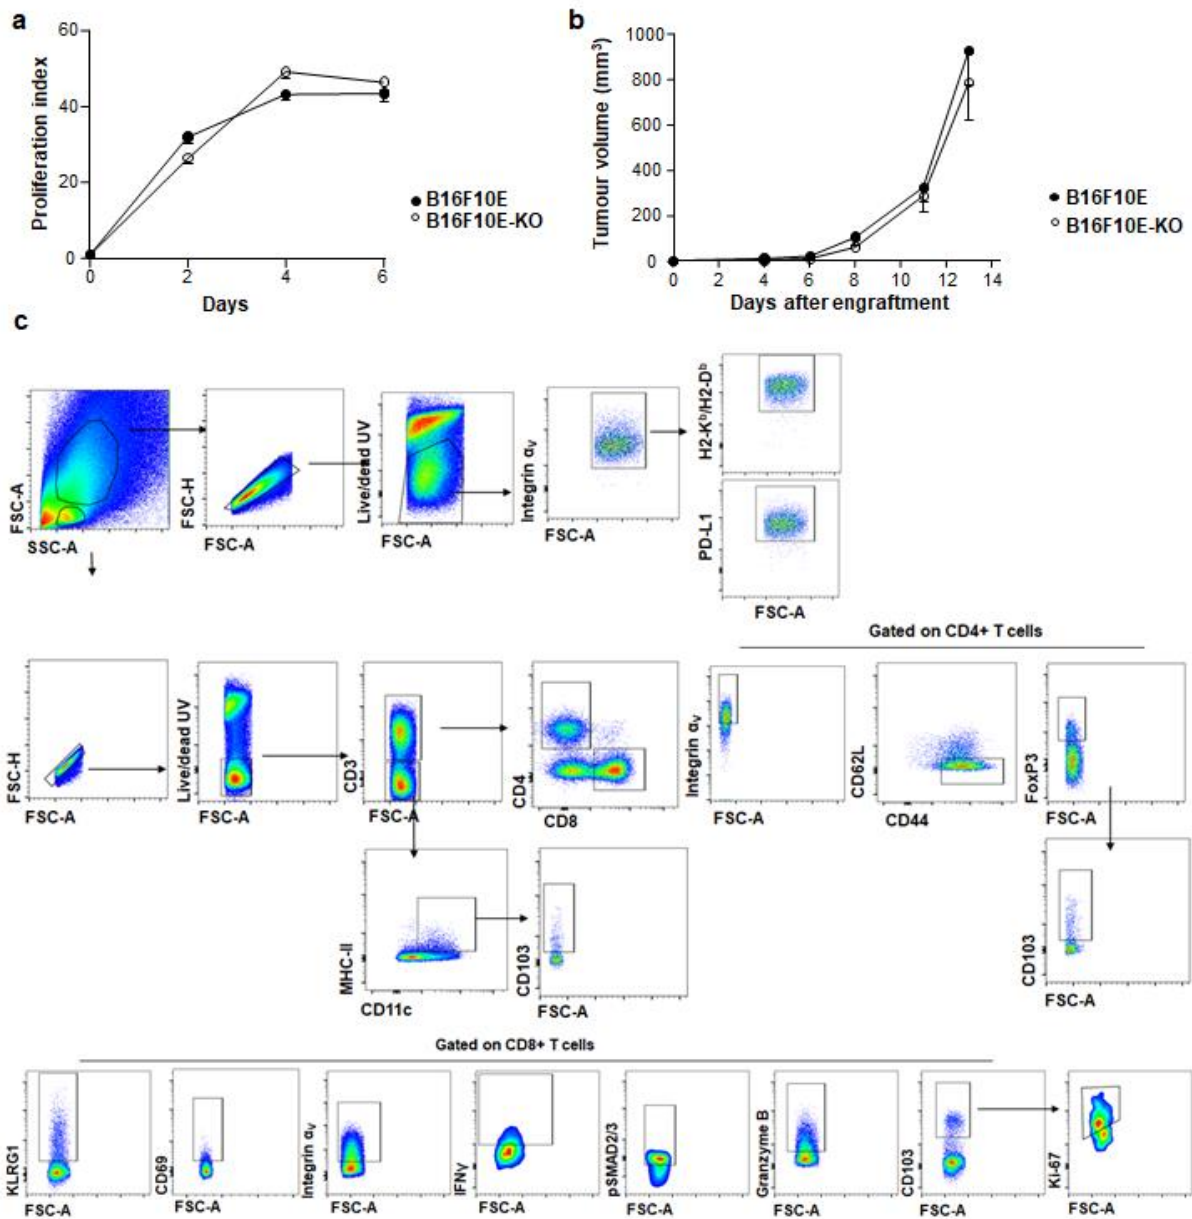

**Supplementary Figure 5.** B16F10E and B16F10E-KO tumour cell proliferation and growth kinetics, and gating strategies. **a.** Proliferation index of CFSE-labelled B16F10E and B16F10E-KO cells (n=3) analysed in vitro by flow cytometry every two days for six days ( $p > 0,9999$ ). Data are given as means  $\pm$  SEM of one independent experiment out of three. **b.** In vivo tumour growth. Nude athymic mice were engrafted with B16F10E and B16F10E-KO cells. Tumour volumes are given as means  $\pm$  SEM of four mice/group ( $p > 0,9999$ ). Mice were sacrificed at day 14, when tumour size exceeded the tolerated institutional limit. **c.** Gating strategy for mouse tumour cells in B16F10E and B16F10E-KO tumours (first upper panel), used in Supplementary Fig.7c. Second till 4<sup>th</sup> lower row panels, gating strategy for mouse TIL in B16F10E and B16F10E-KO tumours. Representative flow cytometry plots illustrating gating strategy for CD3<sup>+</sup>CD4<sup>+</sup> (FoxP3<sup>neg</sup> and FoxP3<sup>+</sup>) TIL (2<sup>nd</sup> row panel), used in Supplementary Fig. 6a and b; and Supplementary 7b. Gating strategy in the 3<sup>rd</sup> row panel for CD3<sup>-</sup> TIL, used in Supplementary Fig. 6c and Supplementary Figures 7g-h. For CD3<sup>+</sup>CD8<sup>+</sup> TIL, gating strategy is presented in 4<sup>th</sup> row panel and is used in Fig.4c-g, 5b, d, e and f; 6d and f; Supplementary Figures 6a (right) and d; Supplementary Figures 7a and d. Data were calculated with two-way ANOVA (a. and b.). Source data are provided as a Source Data file.

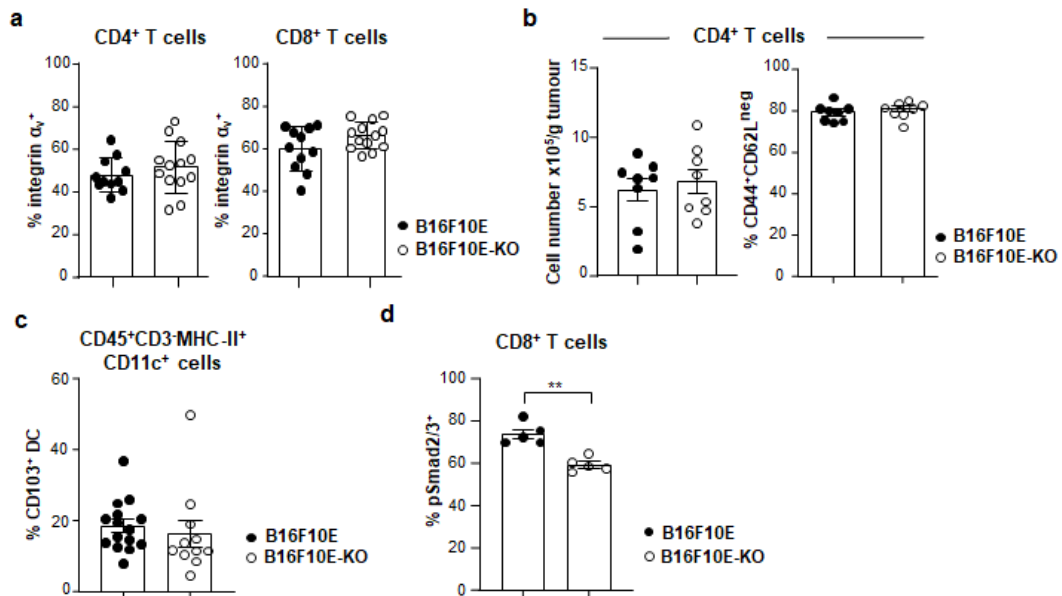

**Supplementary Figure 6.** B16F10E and B16F10E-KO TIL characterization. **a.** Left, percentages of  $\alpha_V$ <sup>+</sup> cells among CD4<sup>+</sup> T cells from B16F10E (n=11) and B16F10E-KO tumours (n=13), p=0.384. Right, percentages of  $\alpha_V$ <sup>+</sup> cells among CD8<sup>+</sup> T cells from the same tumours, p=0.083. Data are from two independent experiments out of three. **b.** Left, absolute cell counts of CD4<sup>+</sup> T cells from B16F10E and B16F10E-KO tumours (n=8), p=0.641. Right, percentages of CD44<sup>+</sup>CD62L<sup>neg</sup> cells in CD4<sup>+</sup> T cells from B16F10E and B16F10E-KO tumours (n=8), p=0.533. Data are from one independent experiment out of three. **c.** Percentages of CD103<sup>+</sup> cells among CD45<sup>+</sup>CD3<sup>+</sup>MHC-II<sup>+</sup>CD11c<sup>+</sup> dendritic cells (DC) from B16F10E (n=15) and B16F10E-KO (n=11) tumours, p=0.590. Data are from two independent experiments out of three. **d.** Percentages of pSmad2/3<sup>+</sup> cells among CD8<sup>+</sup> TIL from B16F10E and B16F10E-KO tumours (n=5), \*\*p=0.004. Data are from one independent experiment out of two. Each symbol represents an individual cell type (a.-d.). Horizontal lines correspond to mean  $\pm$  SEM (a.-d.). Data were calculated with unpaired Student t-test (a.-d.). Source data are provided as a Source Data file.

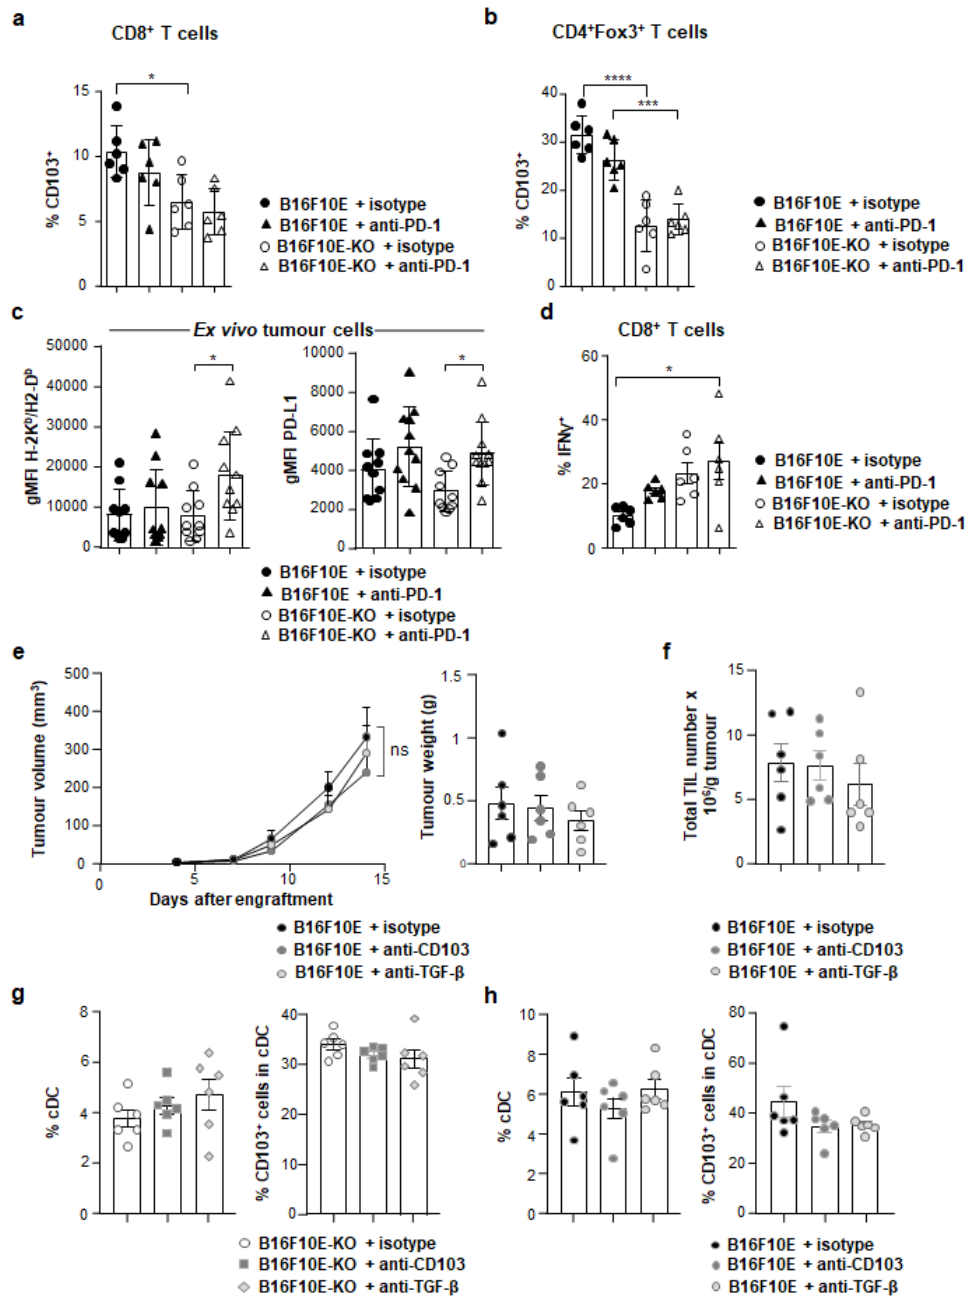

**Supplementary Figure 7.** Frequencies and phenotypic features of TIL in B16F10E and B16F10E-KO tumours.

**a.** Percentages of CD103<sup>+</sup> cells among CD8<sup>+</sup> TIL from B16F10E and B16F10E-KO tumours (n=6), treated with anti-PD-1 mAb or isotype control, \*p=0.024. Data are from one independent experiment out of three. **b.** Percentages of CD103<sup>+</sup> T cells among CD4<sup>+</sup>Foxp3<sup>+</sup> TIL from B16F10E and B16F10E-KO tumours (n=6), treated with anti-PD-1 or isotype control, \*\*\*p=0.0004, \*\*\*\*p<0.0001. Data are from one independent experiment out of three. **c.** gMFI of H-2K<sup>b</sup>/H-2D<sup>b</sup> expression on B16F10E (n=10) and B16F10E-KO cells (n=11) isolated *ex vivo* from mice treated with anti-PD-1 or isotype control, \*p=0.020. Right, gMFI of PD-L1 expression on B16F10E (n=10) and B16F10E-KO cells (n=11), \*p=0.045. **d.** Percentages of IFN $\gamma$ <sup>+</sup> lymphocytes in CD8<sup>+</sup> T cells from B16F10E and B16F10E-KO tumours (n=6) treated with anti-PD-1 mAb or isotype control, \*p=0.011. Data are from two independent experiments out of three. **e.** B16F10E tumour growth. Mice were engrafted with B16F10E cells and then treated i.t. with anti-TGF- $\beta$ , anti-CD103 mAb or isotype control. Tumour volumes are means  $\pm$  SEM of six mice/group, p=0.822. Right, weight of B16F10E tumours (n=6) recovered at day 14, p=0.656. **f.** Absolute number of TIL from B16F10E tumours (n=6) treated with anti-TGF- $\beta$ , anti-CD103 or isotype control mAb, p=0.673. **g.** Percentages of conventional (c)DC in B16F10E-KO tumours (n=6) treated with isotype control, anti-CD103 or anti-TGF- $\beta$  neutralizing mAb, p=0.357. Right, percentages of CD103<sup>+</sup> cDC in B16F10E-KO tumours (n=6), p=0.313. **h.** Percentages of cDC in B16F10E tumours (n=6), treated with isotype control, anti-CD103 or anti-TGF- $\beta$  neutralizing mAb, p=0.503. Right, percentages of CD103<sup>+</sup> cDC in B16F10E tumours (n=6), p=0.194. Each symbol represents an individual cell type. Horizontal lines are means  $\pm$  SEM. Data were calculated with one-way ANOVA with Tukey's correction (a.- e. right, f.-h.), and two-way ANOVA (e. left). ns: non-significant. Source data are provided as a Source Data file.



**Supplementary Table 1:** Population description and immunohistochemistry data of the first anti-PD-(L)1 cohort (cohort 1)

| Total number                   |                             | Integrin $\alpha_v$ |                           |                            | p-value |
|--------------------------------|-----------------------------|---------------------|---------------------------|----------------------------|---------|
|                                |                             | Overall population  | Integrin $\alpha_v$ (low) | Integrin $\alpha_v$ (high) |         |
|                                |                             | N=106               | N=89                      | N=17                       |         |
| Histological subtype           | Adenocarcinoma              | 62 (59%)            | 52 (58%)                  | 10 (59%)                   | 0.527   |
|                                | Squamous                    | 29 (27%)            | 23 (26%)                  | 6 (35%)                    |         |
|                                | NSCLC, other                | 15 (14%)            | 14 (16%)                  | 1 (6%)                     |         |
| Gender                         | Female                      | 29 (27%)            | 23 (26%)                  | 6 (35%)                    | 0.423   |
|                                | Male                        | 77 (73%)            | 66 (74%)                  | 11 (65%)                   |         |
| Smoking status                 | Current-smoker              | 35 (33%)            | 31 (35%)                  | 4 (24%)                    | 0.663   |
|                                | Former-smoker               | 61 (58%)            | 50 (56%)                  | 11 (65%)                   |         |
|                                | Non-smoker                  | 10 (9%)             | 8 (9%)                    | 2 (12%)                    |         |
| Age (years)                    | <65                         | 48 (45%)            | 39 (44%)                  | 9 (53%)                    | 0.489   |
|                                | ≥65                         | 58 (55%)            | 50 (56%)                  | 8 (47%)                    |         |
| Advanced stage at diagnosis    | III                         | 12 (13%)            | 8 (9%)                    | 4 (23%)                    | 0.262   |
|                                | IVA                         | 27 (26%)            | 25 (28%)                  | 2 (12%)                    |         |
|                                | IVB                         | 66 (63%)            | 55 (63%)                  | 11 (65%)                   |         |
|                                | NA                          | 1                   | 1                         | 0                          |         |
| Molecular status               | <i>EGFR</i> mutation        | 5 (6%)              | 5 (8%)                    | 0                          | 1       |
|                                | <i>ALK</i> fusion           | 2 (3%)              | 2 (3%)                    | 0                          | 1       |
|                                | <i>KRAS</i> mutation        | 25 (32%)            | 20 (30%)                  | 5 (42%)                    | 0.438   |
|                                | <i>BRAF</i> mutation        | 3 (4%)              | 3 (5%)                    | 0                          | 1       |
| Previous therapies             | Platinum-based chemotherapy | 49 (46%)            | 39 (44%)                  | 10 (59%)                   | 0.361   |
|                                | Other therapies             | 32 (30%)            | 27 (30%)                  | 5 (29%)                    |         |
|                                | No prior therapy            | 9 (8%)              | 9 (10%)                   | 0                          |         |
|                                | Chemoradiation              | 16 (15%)            | 14 (16%)                  | 2 (12%)                    |         |
| Number of metastatic sites     | ≤2                          | 52 (49%)            | 43 (48%)                  | 9 (53%)                    | 0.727   |
|                                | >2                          | 54 (51%)            | 46 (52%)                  | 8 (47%)                    |         |
| Immunotherapy                  | Atezolizumab                | 13 (12%)            | 10 (11%)                  | 3 (18%)                    | 0.695   |
|                                | Durvalumab                  | 1 (1%)              | 1 (1%)                    | 0                          |         |
|                                | Nivolumab                   | 69 (65%)            | 57 (64%)                  | 12 (71%)                   |         |
|                                | Pembrolizumab               | 23 (22%)            | 21 (24%)                  | 2 (12%)                    |         |
| Line of immunotherapy          | ≤2                          | 65 (61%)            | 58 (65%)                  | 7 (41%)                    | 0.774   |
|                                | >2                          | 41 (39%)            | 31 (35%)                  | 10 (59%)                   |         |
| Density CD8 <sup>+</sup> cells | High                        | 62 (72%)            | 43 (77%)                  | 11 (69%)                   | 0.513   |
|                                | Low                         | 24 (28%)            | 13 (23%)                  | 5 (31%)                    |         |
|                                | Missing                     | 20                  | 33                        | 1                          |         |
| Performance status             | 0-1                         | 89 (85%)            | 78 (88%)                  | 11 (69%)                   | 0.050   |
|                                | ≥2                          | 16 (15%)            | 11 (12%)                  | 5 (31%)                    |         |
|                                | NA                          | 1                   | 0                         | 1                          |         |
| Response rate                  | CR                          | 1 (1%)              | 1 (1%)                    | 0                          | 0.154   |
|                                | PR                          | 22 (22%)            | 19 (22%)                  | 3 (19%)                    |         |
|                                | SD                          | 37 (36%)            | 33 (38%)                  | 4 (25%)                    |         |
|                                | PD                          | 42 (41%)            | 33 (38%)                  | 9 (56%)                    |         |
|                                | NA                          | 4                   | 3                         | 1                          |         |

Clinical characteristics of NSCLC patients treated with anti-PD-(L)1. CR: complete response; PR: partial response; SD: stable disease; PD: progression disease; NA: not available. All tests were two-sided, no adjustments were made for multiple comparisons.

**Supplementary Table 2:** Population description and immunohistochemistry data of the second anti-PD-(L)1 cohort (cohort 2)

| Total number            |                             | Integrin $\alpha_v$ |                           |                            | p-value |
|-------------------------|-----------------------------|---------------------|---------------------------|----------------------------|---------|
|                         |                             | Overall population  | Integrin $\alpha_v$ (low) | Integrin $\alpha_v$ (high) |         |
|                         |                             | N=51                | N=42                      | N=9                        |         |
| Histological subtype    | Adenocarcinoma              | 39 (76%)            | 31 (74%)                  | 8 (89%)                    | 1       |
|                         | Squamous                    | 3 (6%)              | 3 (7%)                    | 0                          |         |
|                         | NSCLC, other                | 9 (18%)             | 8 (19%)                   | 1 (11%)                    |         |
| Gender                  | Female                      | 23 (45%)            | 19 (45%)                  | 4 (44%)                    | 1       |
|                         | Male                        | 28 (55%)            | 23 (55%)                  | 5 (56%)                    |         |
| Smoking status          | Current-smoker              | 21 (41%)            | 19 (45%)                  | 2 (22%)                    | 0.339   |
|                         | Former-smoker               | 24 (47%)            | 18 (43%)                  | 6 (67%)                    |         |
|                         | Non-smoker                  | 6 (12%)             | 5 (12%)                   | 1 (11%)                    |         |
| Age (years)             | <65                         | 27 (53%)            | 20 (47%)                  | 7 (78%)                    | 0.147   |
|                         | ≥ 65                        | 24 (47%)            | 22 (52%)                  | 2 (22%)                    |         |
| Stage advance diagnosis | IIA                         | 1 (2%)              | 1 (2%)                    | 0                          | 0.772   |
|                         | IIB                         | 1 (2%)              | 1 (2%)                    | 0                          |         |
|                         | IVA                         | 11 (22%)            | 10 (24%)                  | 1 (11%)                    |         |
|                         | IVB                         | 38 (74%)            | 30 (72%)                  | 8 (89%)                    |         |
| Molecular status        | <i>EGFR</i> mutation        | 4 (8%)              | 3 (8%)                    | 1 (11%)                    | 1       |
|                         | <i>ALK</i> fusion           | 2 (4%)              | 1 (3%)                    | 1 (11%)                    | 0.337   |
|                         | <i>KRAS</i> mutation        | 18 (38%)            | 14 (36%)                  | 4 (44%)                    | 0.711   |
|                         | <i>BRAF</i> mutation        | 2 (4%)              | 2 (5%)                    | 0                          | 1       |
| Previous therapies      | Platinum-based chemotherapy | 29 (57%)            | 25 (60%)                  | 4 (44%)                    | 0.401   |
|                         | Other therapies             | 11 (22%)            | 9 (21%)                   | 2 (22%)                    |         |
|                         | No prior therapy            | 4 (8%)              | 3 (7%)                    | 1 (11%)                    |         |
|                         | NA                          | 4 (7%)              | 2 (5%)                    | 2 (23%)                    |         |
|                         | Chemoradiation              | 3 (6%)              | 3 (7%)                    | 0                          |         |
| Immunotherapy           | Nivolumab                   | 26 (51%)            | 22 (52%)                  | 4 (44%)                    | 0.726   |
|                         | Pembrolizumab               | 25 (49%)            | 20 (48%)                  | 5 (56%)                    |         |
| Line of immunotherapy   | ≤2                          | 38 (75%)            | 33 (79%)                  | 5 (56%)                    | 0.208   |
|                         | >2                          | 13 (25%)            | 9 (21%)                   | 4 (44%)                    |         |
| Performance status      | 0-1                         | 29 (57%)            | 25 (60%)                  | 4 (44%)                    | 0.076   |
|                         | ≥2                          | 22 (43%)            | 17 (40%)                  | 5 (56%)                    |         |
| Response rate           | CR                          | 2 (4%)              | 2 (8%)                    | 0                          | 0.343   |
|                         | PR                          | 10 (20%)            | 7 (17%)                   | 3 (33%)                    |         |
|                         | SD                          | 10 (20%)            | 10 (24%)                  | 0                          |         |
|                         | PD                          | 26 (51%)            | 21 (50%)                  | 5 (56%)                    |         |
|                         | NA                          | 3 (5%)              | 2 (1%)                    | 1 (11%)                    |         |

Clinical characteristics of NSCLC patients treated with anti-PD-(L)1. CR: complete response; PR: partial response; SD: stable disease; PD: progression disease; NA: not available. All tests were two-sided, no adjustments were made for multiple comparisons.

**Supplementary Table 3:** Multivariable analysis for progression free survival (PFS) performed on the pooled cohort

|                             | HR (95%CI)       | p-value |
|-----------------------------|------------------|---------|
| Age > 65 years              | 1.21 (0.84-1.75) | 0.31    |
| Smokers                     | 0.40 (0.23-0.70) | 0.001   |
| Line of immunotherapy > 2   | 1.23 (0.84-1.81) | 0.29    |
| Performance status $\geq 2$ | 1.61 (1.07-2.43) | 0.02    |
| $\alpha_v^{\text{high}}$    | 1.60 (0.98-2.62) | 0.06    |

Analyses were performed on cohort 1 plus cohort 2 (n=157). HR: hazard ratio; CI: confidence interval. All tests were two-sided, no adjustments were made for multiple comparisons.

**Supplementary Table 4:** Integrin  $\alpha_v$ ,  $\beta_6$  and  $\beta_8$  protein expression in NSCLC cell lines

|                  | $\alpha_v$   | $\beta_6$    | $\beta_8$   |
|------------------|--------------|--------------|-------------|
| NSCLC cell lines | % (gMFI)     | % (gMFI)     | % (gMFI)    |
| <b>LCC</b>       |              |              |             |
| IGR-Heu          | 1%           | 0%           | 0%          |
| IGR-B2           | 100% (76651) | 100% (65366) | 21% (30319) |
| H1155            | 4%           | 0%           | 0%          |
| H460             | 3%           | 3%           | 0%          |
| <b>ADC</b>       |              |              |             |
| ADC-CocoT7       | 60% (67878)  | 0%           | 1%          |
| IGR-Pub          | 95% (69211)  | 0%           | 0%          |
| ADC-Tor          | 61% (91263)  | 0%           | 0%          |
| ADC-Let          | 39% (97887)  | 0%           | 0%          |
| A549             | 90% (84607)  | 5%           | 0%          |
| H1355            | 23% (32197)  | 0%           | 1%          |
| <b>SCC</b>       |              |              |             |
| Lud-Lu           | 8%           | 0%           | 0%          |
| SK-MES           | 96% (55538)  | 0%           | 0%          |
| <b>SCLC</b>      |              |              |             |
| DMS-53           | 19% (26974)  | 49% (32754)  | 0%          |

Percentages and gMFI are included. 16HBE human bronchial epithelial cells were used as a control.

**Supplementary Table 5:** Expression of *ITGB1*, *ITGB3* and *ITGB5*, and *TGFB1* mRNA in NSCLC cell lines

|                  | <i>ITGB1</i> | <i>ITGB3</i> | <i>ITGB5</i> | <i>TGFB1</i> |
|------------------|--------------|--------------|--------------|--------------|
| NSCLC cell lines |              |              |              |              |
| LCC              |              |              |              |              |
| IGR-B2           | 1.1          | 6.9          | 0.0          | 1.8          |
| IGR-Heu          | 1.2          | 0            | 0.8          | 0.3          |
| H1155            | 0.2          | 7.7          | 0.1          | 2.4          |
| H460             | 0.6          | 0            | 0.3          | 0.5          |
| ADC              |              |              |              |              |
| ADC-CocoT7       | 2.9          | 12.4         | 3.6          | 1.3          |
| IGR-Pub          | 3.8          | 2.7          | 1.6          | 1.1          |
| ADC-Tor          | 7.7          | 4.0          | 2.4          | 7.2          |
| ADC-Let          | 1.3          | 8.0          | 0.8          | 1            |
| A549             | 3.1          | 35.0         | 1.8          | 2            |
| H1355            | 1.3          | 2.0          | 0.8          | 0.4          |
| SCC              |              |              |              |              |
| Lud-Lu           | 0.8          | 0            | 0.3          | 1            |
| SK-MES           | 3.3          | 0.6          | 1.0          | 0.5          |
| SCLC             |              |              |              |              |
| DMS-53           | 0.2          | 0.4          | 0.2          | 0.7          |

Expression was normalized to *18S* expression. 16HBE human bronchial epithelial cells were used as a control. High expression is in bold. Data are presented as fold changes.

**Supplementary Table 6: Primer pairs used for qRT-PCR**

## Human primer pairs

|              | 5' Forward primer 3'   | 3' Reverse primer 5'     |
|--------------|------------------------|--------------------------|
| <i>ITGAV</i> | GCACCAGCAGTCAGAGATG    | TGAACAACCTGGCCCAACATC    |
| <i>ITGB1</i> | GGGAGCCACAGACATTTACATT | CCGAAGTAATCCTCCTCATTTC   |
| <i>ITGB3</i> | AACTGTGCCCCAGAATCCAT   | AATCCTCTGGGGACTGACTTGA   |
| <i>ITGB5</i> | TGATCTGAGGGCAAACCTTGT  | GCAATCTCCTGTGGTGTGTCATCT |
| <i>ITGB6</i> | ATCTGGAGTTGGCGAAAGG    | CTTTGAGGCGCAATCTGAAC     |
| <i>ITGB8</i> | CCACCCCGAAAGGATTCATAAT | TGGCGTCAAACCTCCTTCT      |
| <i>TGFB1</i> | GCAACAATTCCTGGCGATACCT | GCTAAGGCGAAAGCCCTCAAT    |
| <i>18S</i>   | CGGACAGGATTGACAGATTG   | CAAATCGCTCCACCAACT       |

## Mouse primer pairs

|              | 5' Forward primer 3'    | 3' Reverse primer 5'    |
|--------------|-------------------------|-------------------------|
| <i>itgb1</i> | ATGCCAAATCTTGCGGAGAAT   | TTTGCTGCGATTGGTGCATT    |
| <i>itgb3</i> | GTCACATTGGCACCCGACAACC  | CCACACTCAAAGTCCCGTTC    |
| <i>itgb5</i> | GATGCGGTCCTCCAGGCTGC    | CACTGGCCATCGTGGGGCTG    |
| <i>itgb6</i> | ACTACCCTTCATTGAAAACCCTG | TGAGGAGCAATCTGAACAATGTC |
| <i>itgb8</i> | TCCTCTGAAGAAATACCCCGTG  | TGGCGAGACAGTTTTATCCACA  |
| <i>18S</i>   | CGGACAGGATTGACAGATTG    | CAAATCGCTCCACCAACT      |
